# Supplementary material for: Intense red photoluminescence and mechanoluminescence from Mn2+-activated SrZnSO with a layered structure
Source: Royal Society of Chemistry journal article supplement (doi:10.1039/c9tc02504a), 2019-01-01
Supplement: c9tc02504a1.pdf [file c9tc02504a1.pdf]

## Supporting Information

### Intense Red Emitting Photoluminescence and Mechanoluminescence from Mn<sup>2+</sup>-Activated SrZnSO with layered structure

Yu Zhou<sup>a</sup>, Yun-Ling Yang<sup>a</sup>, Yu-Ting Fan<sup>a</sup>, Woonchul Yang<sup>b</sup>, Wei-Bin Zhang<sup>c</sup>, Jian-Feng Hu<sup>a</sup>, Zhi-Jun Zhang<sup>a,b,\*</sup> and Jing-Tai Zhao<sup>a</sup>

<sup>a</sup>. School of Materials Science and Engineering, Shanghai University, Shanghai, 200444, P. R. China.

<sup>b</sup>. Department of Physics, Dongguk University, Pildong-ro, Choong-gu, Seoul 100-715, Korea.

<sup>c</sup>. School of Physics and Optoelectronic Engineering, Yangtze University, Jingzhou, 434023, P. R. China.

\*: Corresponding author: E-mail: zhangzhijun@shu.edu.cn

Table S1. Main refinement parameters and crystallographic data for SrZn<sub>1-x</sub>Mn<sub>x</sub>SO ( $x = 0, 0.01$  and  $0.02$ ).

| Composition                  | $x = 0$                     | $x = 0.01$                  | $x = 0.02$                  |
|------------------------------|-----------------------------|-----------------------------|-----------------------------|
| Crystal system               | Hexagonal                   | Hexagonal                   | Hexagonal                   |
| Space group                  | P6 <sub>3</sub> mc (No.186) | P6 <sub>3</sub> mc (No.186) | P6 <sub>3</sub> mc (No.186) |
| a (Å)                        | 3.9111(2)                   | 3.9123(13)                  | 3.9137(8)                   |
| c (Å)                        | 11.6141(6)                  | 11.6147(4)                  | 11.6205(3)                  |
| V (Å <sup>3</sup> )          | 153.854(14)                 | 153.961(9)                  | 154.149(6)                  |
| $\alpha = \beta$             | 90°                         | 90°                         | 90°                         |
| $\gamma$                     | 120°                        | 120°                        | 120°                        |
| 2 $\theta$ interval          | 5°-130°                     | 5°-130°                     | 5°-130°                     |
| Density (g/cm <sup>3</sup> ) | 4.288                       | 4.270                       | 4.551                       |
| Zn/Mn-S (Å)                  | 2.400                       | 2.423                       | 2.398                       |
| Zn/Mn-O (Å)                  | 1.974                       | 1.996                       | 2.083                       |
| Sr-S (Å)                     | 3.157                       | 3.182                       | 3.233                       |
| Sr-O (Å)                     | 2.400                       | 2.363                       | 2.341                       |
| R <sub>p</sub>               | 12.9                        | 9.81                        | 18.5                        |
| R <sub>wp</sub>              | 11.4                        | 9.98                        | 16.4                        |
| R <sub>exp</sub>             | 7.66                        | 5.36                        | 7.14                        |
| $\chi^2$                     | 2.21                        | 3.46                        | 5.30                        |
